# Supplementary material for: Fine Particulate Matter Concentrations in Urban Chinese Cities, 2005–2016: A Systematic Review
Source: MDPI journal article supplement (doi:10.3390/ijerph14020191), 2017-02-14
Supplement: s1 [file s1]

# Supplementary Materials: Fine Particulate Matter Concentrations in Urban Chinese Cities, 2005–2016: A Systematic Review

Mike Z. He, Xiang Zeng, Kaiyue Zhang and Patrick L. Kinney

Codebook for Supplemental Data

**Author** – author(s) of the study that the data was extracted from

**Region** – represents six possible geographic regions (Northeastern, Northern, Northwestern, Eastern, South Central, and Southwestern), Beijing, and Taiwan

**City** – city that extracted data came from

**YearPublished** – article’s year of publication

**YearCollected** – year(s) that data used in the study was collected from

**MonthDate** – specific months/dates for data collection (when available); data collected over entire year or multiple years are marked as “Annual”

**Season** – denoted as Spring (March-May), Summer (June-August), Autumn (September-November), and Winter (December-February)

**PM25gm3** – concentration of PM<sub>2.5</sub>, measured in µg/m<sup>3</sup>

**SD** – standard deviation of PM25gm3

**SampleSize** – number of sampling days in the city where data is collected

**Hour/Annual** – dichotomous variable defining data as 24-hour or annual data

**Exceed35Limit** – dichotomous variable on whether data point exceeds China’s annual PM<sub>2.5</sub> limit of 35µg/m<sup>3</sup> (0=no, 1=yes)

**Exceed75Limit** – dichotomous variable on whether data point exceeds China’s 24-hour PM<sub>2.5</sub> limit of 75µg/m<sup>3</sup> (0=no, 1=yes)

**DataCollectionMethods** – notes describing the data source, methods, and instruments used for data collection, whenever available
